# Supplementary material for: Use of analgesics and psychotropic medication: Findings from the Lolland- Falster Health Study
Source: Research Square preprint supplement (doi:10.21203/rs.3.rs-5694365/v1), 2024-12-30
Supplement: Supplementary file 1 [file 13b9b184c83095c56ae3690b.docx]

**Supplementary Table 1. Lolland-Falster Health Study (LOFUS) female participants. Association between drug use and disease**

| **Daily/almost daily drug use** | **Disease reported** | **Total**  **n (%)** | **Drug/disease** | | | | **%**  **user with disease** | **%**  **disease**  **without use** |
| --- | --- | --- | --- | --- | --- | --- | --- | --- |
| **+/+**  **n (%)** | **+/-**  **n (%)** | **-/+**  **n (%)** | **-/-**  **n (%)** |
| **Antidepressant** | 1+ disease | 8056 (100) | 489 (6.1) | 16 (0.2) | 5765 (71.6) | 1786 (22.2) | 96.8 | 92.2 |
|  | 1+ psychiatric disease | 8056 (100) | 421 (5.2) | 84 (1.0) | 610 (7.6) | 6941 (86.2) | 83.4 | 59.2 |
|  | 1+ somatic disease | 8056 (100) | 451 (5.6) | 54 (0.7) | 5681 (70.5) | 1870 (23.2) | 89.3 | 92.6 |
|  | Depression | 8056 (100) | 348 (4.3) | 157 (1.9) | 348 (4.3) | 7203 (89.4) | 68.9 | 50.0 |
|  | Anxiety | 8056 (100) | 262 (3.3) | 243 (3.0) | 444 (5.5) | 7107 (88.2) | 51.9 | 62.9 |
|  | Deep vein thrombosis | 8056 (100) | 15 (0.2) | 490 (6.1) | 104 (1.3) | 7447 (92.4) | 3.0 | 87.4 |
|  | Heart attack | 8056 (100) | 11 (0.1) | 494 (6.1) | 114 (1.4) | 7437 (92.3) | 2.2 | 91.9 |
|  | Atherosclerosis | 8056 (100) | 12 (0.1) | 493 (6.1) | 98 (1.2) | 7453 (92.5) | 2.4 | 89.1 |
|  | Angina pectoris | 8056 (100) | 15 (0.2) | 490 (6.1) | 152 (1.9) | 7399 (91.8) | 3.0 | 91.0 |
|  | Hypertension | 8056 (100) | 155 (1.9) | 350 (4.3) | 1758 (21.8) | 5793 (71.9) | 30.7 | 91.9 |
|  | Diabetes | 8056 (100) | 31 (0.4) | 474 (5.9) | 290 (3.6) | 7261 (90.1) | 6.1 | 90.3 |
|  | Asthma | 8056 (100) | 60 (0.7) | 445 (5.5) | 459 (5.7) | 7092 (88.0) | 11.9 | 88.4 |
|  | Bronchitis | 8056 (100) | 42 (0.5) | 463 (5.7) | 296 (3.7) | 7255 (90.1) | 8.3 | 87.6 |
|  | Allergy (excl. asthma) | 8056 (100) | 124 (1.5) | 381 (4.7) | 1487 (18.5) | 6064 (75.3) | 24.6 | 92.3 |
|  | Kidney disease | 8056 (100) | 10 (0.1) | 495 (6.1) | 77 (1.0) | 7474 (92.8) | 2.0 | 88.5 |
|  | Cancer | 8056 (100) | 15 (0.2) | 490 (6.1) | 265 (3.3) | 7286 (90.4) | 3.0 | 94.6 |
|  | Osteoarthritis | 8056 (100) | 237 (2.9) | 268 (3.3) | 2481 (30.8) | 5070 (63.0) | 46.9 | 91.3 |
|  | Rheumatic arthritis | 8056 (100) | 41 (0.5) | 464 (5.8) | 568 (7.1) | 6983 (86.7) | 8.1 | 93.3 |
|  | Migraine/ frequent headaches | 8056 (100) | 144 (1.8) | 361 (4.5) | 1407 (17.5) | 6144 (76.3) | 28.5 | 90.7 |
|  | Spinal disc herniation/ back problem | 8056 (100) | 150 (1.9) | 355 (4.4) | 1306 (16.2) | 6245 (77.5) | 29.7 | 89.7 |
|  | Other disease | 8056 (100) | 186 (2.3) | 319 (4.0) | 1799 (22.3) | 5752 (71.4) | 36.8 | 90.6 |
| **Tranquilizer/ sedative** | 1+ disease | 8057 (100) | 362 (4.0) | 12 (0.1) | 5893 (73.1) | 1790 (22.2) | 96.8 | 94.2 |
|  | 1+ psychiatric disease | 8057 (100) | 250 (3.1) | 124 (1.5) | 776 (9.6) | 6907 (85.7) | 66.8 | 75.6 |
|  | 1+ somatic disease | 8057 (100) | 353 (4.4) | 21 (0.2) | 5782 (71.8) | 1901 (23.6) | 94.4 | 94.2 |
|  | Depression | 8057 (100) | 201 (2.5) | 173 (2.1) | 491 (6.1) | 7192 (89.3) | 53.7 | 71.0 |
|  | Anxiety | 8057 (100) | 185 (2.3) | 189 (2.3) | 518 (6.4) | 7165 (88.9) | 49.5 | 73.7 |
|  | Deep vein thrombosis | 8057 (100) | 10 (0.1) | 364 (4.5) | 111 (1.4) | 7572 (94.0) | 2.7 | 91.7 |
|  | Heart attack | 8057 (100) | 7 (0.0) | 367 (4.6) | 118 (1.5) | 7565 (93.9) | 1.9 | 94.4 |
|  | Atherosclerosis | 8057 (100) | 14 (0.2) | 360 (4.5) | 95 (1.2) | 7588 (94.2) | 3.7 | 87.2 |
|  | Angina pectoris | 8057 (100) | 15 (0.2) | 359 (4.5) | 150 (1.9) | 7533 (93.5) | 4.0 | 90.9 |
|  | Hypertension | 8057 (100) | 129 (1.6) | 245 (3.0) | 1781 (22.1) | 5902 (73.3) | 34.5 | 93.2 |
|  | Diabetes | 8057 (100) | 35 (0.4) | 339 (4.2) | 282 (3.5) | 7401 (91.9) | 9.4 | 89.0 |
|  | Asthma | 8057 (100) | 47 (0.6) | 327 (4.1) | 471 (5.8) | 7212 (89.5) | 12.6 | 90.9 |
|  | Bronchitis | 8057 (100) | 40 (0.5) | 334 (4.1) | 300 (3.7) | 7383 (91.6) | 10.7 | 88.2 |
|  | Allergy (excl. asthma) | 8057 (100) | 96 (1.2) | 278 (4.5) | 1515 (18.8) | 6168 (76.6) | 25.7 | 94.0 |
|  | Kidney disease | 8057 (100) | 10 (0.1) | 364 (4.5) | 77 (1.0) | 7606 (94.4) | 2.7 | 88.5 |
|  | Cancer | 8057 (100) | 20 (0.2) | 354 (4.4) | 262 (3.3) | 7421 (92.1) | 5.3 | 92.9 |
|  | Osteoarthritis | 8057 (100) | 190 (2.4) | 184 (2.3) | 2526 (31.4) | 5157 (64.0) | 50.8 | 93.0 |
|  | Rheumatic arthritis | 8057 (100) | 54 (0.7) | 320 (4.0) | 557 (6.9) | 7126 (88.4) | 14.4 | 91.2 |
|  | Migraine/ frequent headaches | 8057 (100) | 104 (1.3) | 270 (3.4) | 1445 (17.9) | 6238 (77.4) | 27.8 | 93.3 |
|  | Spinal disc herniation/ back problem | 8057 (100) | 132 (1.6) | 242 (3.0) | 1328 (16.5) | 6355 (78.9) | 35.3 | 91.0 |
|  | Other disease | 8057 (100) | 154 (1.9) | 220 (2.7) | 1830 (22.7) | 5853 (72.6) | 41.2 | 92.2 |
| **Analgesics** | 1+ disease | 8094 (100) | 1939 (24.0) | 66 (0.8) | 4353 (53.8) | 1736 (21.4) | 96.7 | 69.2 |
|  | 1+ psychiatric disease | 8094 (100) | 442 (5.5) | 1563 (19.3) | 590 (7.3) | 5499 (67.9) | 22.0 | 57.2 |
|  | 1+ somatic disease | 8094 (100) | 1928 (23.8) | 77 (1.0) | 4244 (52.4) | 1845 (22.8) | 96.2 | 68.8 |
|  | Depression | 8094 (100) | 331 (4.1) | 1674 (20.7) | 367 (4.5) | 5722 (70.7) | 16.5 | 52.6 |
|  | Anxiety | 8094 (100) | 298 (3.7) | 1707 (21.1) | 407 (5.0) | 5682 (70.2) | 14.9 | 57.7 |
|  | Deep vein thrombosis | 8094 (100) | 40 (0.5) | 1965 (24.3) | 79 (1.0) | 6010 (74.3) | 2.0 | 66.4 |
|  | Heart attack | 8094 (100) | 44 (0.5) | 1961 (24.2) | 82 (1.0) | 6007 (74.2) | 2.2 | 65.1 |
|  | Atherosclerosis | 8094 (100) | 48 (0.6) | 1957 (24.2) | 64 (0.8) | 6025 (74.4) | 2.4 | 57.1 |
|  | Angina pectoris | 8094 (100) | 79 (1.0) | 1926 (23.8) | 89 (1.1) | 6000 (74.1) | 3.9 | 53.0 |
|  | Hypertension | 8094 (100) | 683 (8.4) | 1322 (16.3) | 1242 (15.3) | 4847 (59.9) | 34.1 | 64.5 |
|  | Diabetes | 8094 (100) | 144 (1.8) | 1861 (23.0) | 180 (2.2) | 5909 (73.0) | 7.2 | 55.6 |
|  | Asthma | 8094 (100) | 201 (2.5) | 1804 (22.3) | 321 (4.0) | 5768 (71.3) | 10.0 | 61.5 |
|  | Bronchitis | 8094 (100) | 166 (2.1) | 1839 (22.7) | 176 (2.2) | 5913 (73.1) | 8.3 | 51.5 |
|  | Allergy (excl. asthma) | 8094 (100) | 478 (5.9) | 1527 (18.9) | 1144 (14.1) | 4945 (61.1) | 23.8 | 70.5 |
|  | Kidney disease | 8094 (100) | 36 (0.4) | 1969 (24.3) | 51 (0.6) | 6038 (74.6) | 1.8 | 58.6 |
|  | Cancer | 8094 (100) | 91 (1.1) | 1914 (23.6) | 192 (2.4) | 5897 (72.9) | 4.5 | 67.8 |
|  | Osteoarthritis | 8094 (100) | 1177 (14.5) | 828 (10.2) | 1566 (19.3) | 4523 (55.9) | 58.7 | 57.1 |
|  | Rheumatic arthritis | 8094 (100) | 308 (3.8) | 1697 (21.0) | 309 (3.8) | 5780 (71.4) | 15.4 | 50.1 |
|  | Migraine/ frequent headaches | 8094 (100) | 693 (8.6) | 1312 (16.2) | 862 (10.6) | 5227 (64.6) | 34.6 | 55.4 |
|  | Spinal disc herniation/ back problem | 8094 (100) | 772 (9.5) | 1233 (15.2) | 699 (8.6) | 5390 (66.6) | 38.5 | 47.5 |
|  | Other disease | 8094 (100) | 775 (9.6) | 1230 (15.2) | 1222 (15.1) | 4867 (60.1) | 38.7 | 61.2 |
| **Sleeping medication** | 1+ disease | 7855 (100) | 246 (3.1) | 13 (0.2) | 5840 (74.3) | 1756 (22.4) | 95.0 | 96.0 |
|  | 1+ psychiatric disease | 7855 (100) | 115 (1.5) | 144 (1.9) | 888 (11.3) | 6708 (85.4) | 44.4 | 88.5 |
|  | 1+ somatic disease | 7855 (100) | 237 (3.0) | 22 (0.3) | 5730 (72.9) | 1866 (23.8) | 91.5 | 96.0 |
|  | Depression | 7855 (100) | 91 (1.2) | 168 (2.1) | 586 (7.5) | 7010 (89.2) | 35.1 | 86.6 |
|  | Anxiety | 7855 (100) | 85 (1.1) | 174 (2.2) | 600 (7.6) | 6996 (89.1) | 32.8 | 87.6 |
|  | Deep vein thrombosis | 7855 (100) | 7 (0.0) | 252 (3.2) | 112 (1.4) | 7484 (95.3) | 2.7 | 94.1 |
|  | Heart attack | 7855 (100) | 3 (0.0) | 256 (3.3) | 117 (1.5) | 7479 (95.2) | 1.2 | 97.5 |
|  | Atherosclerosis | 7855 (100) | 8 (0.1) | 251 (3.2) | 96 (1.2) | 7500 (95.5) | 3.1 | 92.3 |
|  | Angina pectoris | 7855 (100) | 11 (0.1) | 248 (3.2) | 150 (1.9) | 7446 (94.8) | 4.2 | 93.2 |
|  | Hypertension | 7855 (100) | 71 (0.9) | 188 (2.4) | 1759 (22.4) | 5837 (74.3) | 27.4 | 96.1 |
|  | Diabetes | 7855 (100) | 12 (0.2) | 247 (3.1) | 299 (3.8) | 7297 (92.9) | 4.6 | 96.1 |
|  | Asthma | 7855 (100) | 33 (0.4) | 226 (2.9) | 475 (6.0) | 7121 (90.7) | 12.7 | 93.5 |
|  | Bronchitis | 7855 (100) | 28 (0.4) | 231 (2.9) | 302 (3.8) | 7294 (92.9) | 10.8 | 91.5 |
|  | Allergy (excl. asthma) | 7855 (100) | 61 (0.8) | 198 (2.5) | 1515 (19.3) | 6081 (77.4) | 23.6 | 96.1 |
|  | Kidney disease | 7855 (100) | 6 (0.0) | 253 (3.2) | 79 (1.0) | 7517 (95.7) | 2.3 | 92.9 |
|  | Cancer | 7855 (100) | 14 (0.2) | 245 (3.1) | 262 (3.3) | 7334 (93.4) | 5.4 | 94.9 |
|  | Osteoarthritis | 7855 (100) | 137 (1.7) | 122 (1.6) | 2485 (31.6) | 5111 (65.1) | 52.9 | 94.8 |
|  | Rheumatic arthritis | 7855 (100) | 40 (0.5) | 219 (2.8) | 545 (6.9) | 7051 (89.8) | 15.4 | 93.2 |
|  | Migraine/ frequent headaches | 7855 (100) | 62 (0.8) | 197 (2.5) | 1445 (18.4) | 6151 (78.3) | 23.9 | 95.9 |
|  | Spinal disc herniation/ back problem | 7855 (100) | 92 (1.2) | 167 (2.1) | 1316 (16.8) | 6280 (79.9) | 35.5 | 93.5 |
|  | Other disease | 7855 (100) | 103 (1.3) | 156 (2.0) | 1825 (23.2) | 5771 (73.5) | 39.8 | 94.7 |

Notes: Persons with missing on either drug or disease excluded

**Supplementary Table 2. Lolland-Falster Health Study (LOFUS) male participants. Association between drug use and disease**

| **Daily/almost daily drug use** | **Disease reported** | **Total**  **n (%)** | **Drug/disease** | | | | **%**  **user with disease** | **%**  **disease**  **without use** |
| --- | --- | --- | --- | --- | --- | --- | --- | --- |
| **+ +**  **n (%)** | **+ -**  **n (%)** | **- +**  **n (%)** | **- -**  **n (%)** |
| **Antidepressant** | 1+ disease | 7045 (100) | 235 (3.3) | 8 (0.1) | 4912 (69.7) | 1890 (26.8) | 96.7 | 95.4 |
|  | 1+ psychiatric disease | 7045 (100) | 202 (2.9) | 41 (0.6) | 343 (6.2) | 6459 (91.7) | 83.1 | 62.9 |
|  | 1+ somatic disease | 7045 (100) | 203 (2.9) | 40 (0.6) | 4877 (69.2) | 1925 (27.3) | 83.5 | 96.0 |
|  | Depression | 7045 (100) | 184 (2.6) | 59 (0.8) | 246 (3.5) | 6556 (93.1) | 75.7 | 57.2 |
|  | Anxiety | 7045 (100) | 94 (1.3) | 149 (2.1) | 212 (3.0) | 6590 (93.5) | 38.7 | 69.3 |
|  | Deep vein thrombosis | 7045 (100) | 15 (0.2) | 490 (7.0) | 104 (1.5) | 6671 (94.7) | 2.9 | 94.9 |
|  | Heart attack | 7045 (100) | 11 (0.2) | 494 (7.0) | 114 (1.6) | 6506 (92.3) | 8.2 | 93.7 |
|  | Atherosclerosis | 7045 (100) | 12 (0.2) | 493 (7.0) | 98 (1.4) | 6476 (91.9) | 7.8 | 94.5 |
|  | Angina pectoris | 7045 (100) | 15 (0.2) | 490 (7.0) | 152 (2.2) | 6611 (93.8) | 5.3 | 93.6 |
|  | Hypertension | 7045 (100) | 92 (1.3) | 151 (2.1) | 1819 (25.8) | 4983 (70.7) | 37.9 | 95.2 |
|  | Diabetes | 7045 (100) | 24 (0.3) | 219 (3.1) | 486 (6.9) | 6316 (89.7) | 9.9 | 95.3 |
|  | Asthma | 7045 (100) | 10 (0.1) | 233 (3.3) | 353 (5.0) | 6449 (91.5) | 4.1 | 97.2 |
|  | Bronchitis | 7045 (100) | 25 (0.4) | 218 (3.1) | 316 (4.5) | 6486 (92.1) | 10.3 | 92.7 |
|  | Allergy (excl. asthma) | 7045 (100) | 36 (0.5) | 207 (2.9) | 1066 (15.1) | 5736 (81.4) | 14.8 | 96.7 |
|  | Kidney disease | 7045 (100) | 6 (0.0) | 237 (3.4) | 112 (1.6) | 6690 (95.0) | 2.5 | 94.9 |
|  | Cancer | 7045 (100) | 12 (0.2) | 231 (3.3) | 296 (4.2) | 6506 (92.3) | 4.9 | 96.1 |
|  | Osteoarthritis | 7045 (100) | 95 (1.3) | 148 (2.1) | 1796 (25.5) | 5006 (71.1) | 39.1 | 95.0 |
|  | Rheumatic arthritis | 7045 (100) | 27 (0.4) | 216 (3.1) | 711 (10.1) | 6091 (86.5) | 11.1 | 96.3 |
|  | Migraine/ frequent headaches | 7045 (100) | 38 (0.5) | 205 (2.9) | 603 (8.6) | 6199 (88.0) | 15.6 | 94.1 |
|  | Spinal disc herniation/ back problem | 7045 (100) | 78 (1.1) | 165 (2.3) | 1391 (19.7) | 5411 (76.8) | 32.1 | 94.7 |
|  | Other disease | 7045 (100) | 70 (1.0) | 173 (2.5) | 1333 (18.9) | 5469 (77.6) | 28.8 | 95.0 |
| **Tranquilizer/ sedative** | 1+ disease | 7044 (100) | 170 (2.4) | 12 (0.2) | 4978 (70.7) | 1884 (26.7) | 93.4 | 96.7 |
|  | 1+ psychiatric disease | 7044 (100) | 116 (1.6) | 66 (0.9) | 431 (6.1) | 6431 (91.3) | 63.7 | 78.8 |
|  | 1+ somatic disease | 7044 (100) | 162 (2.3) | 20 (0.3) | 4919 (69.8) | 1943 (27.6) | 89.0 | 96.8 |
|  | Depression | 7044 (100) | 104 (1.5) | 78 (1.1) | 328 (4.7) | 6534 (92.8) | 57.1 | 75.9 |
|  | Anxiety | 7044 (100) | 77 (1.1) | 105 (1.5) | 230 (3.3) | 6632 (94.2) | 42.3 | 74.9 |
|  | Deep vein thrombosis | 7044 (100) | 7 (0.1) | 175 (2.5) | 130 (1.8) | 6732 (95.6) | 3.8 | 94.9 |
|  | Heart attack | 7044 (100) | 12 (0.2) | 170 (2.4) | 304 (4.3) | 6558 (93.1) | 6.6 | 96.2 |
|  | Atherosclerosis | 7044 (100) | 12 (0.2) | 170 (2.4) | 333 (4.7) | 6529 (92.7) | 6.6 | 96.5 |
|  | Angina pectoris | 7044 (100) | 14 (0.2) | 168 (2.4) | 189 (2.7) | 6673 (94.7) | 7.7 | 93.1 |
|  | Hypertension | 7044 (100) | 82 (1.2) | 100 (1.4) | 1830 (26.0) | 5032 (71.4) | 45.1 | 95.7 |
|  | Diabetes | 7044 (100) | 22 (0.3) | 160 (2.3) | 489 (6.9) | 6373 (90.5) | 12.1 | 95.7 |
|  | Asthma | 7044 (100) | 15 (0.2) | 167 (2.4) | 351 (5.0) | 6511 (92.4) | 8.2 | 95.9 |
|  | Bronchitis | 7044 (100) | 22 (0.3) | 160 (2.3) | 321 (4.6) | 6541 (92.9) | 12.1 | 93.6 |
|  | Allergy (excl. asthma) | 7044 (100) | 20 (0.3) | 162 (2.3) | 1084 (15.4) | 5778 (82.0) | 11.0 | 98.2 |
|  | Kidney disease | 7044 (100) | 7 (0.1) | 175 (2.5) | 111 (1.6) | 6751 (95.8) | 3.8 | 94.1 |
|  | Cancer | 7044 (100) | 11 (0.2) | 171 (2.4) | 295 (4.2) | 6567 (93.2) | 6.0 | 96.4 |
|  | Osteoarthritis | 7044 (100) | 76 (1.1) | 106 (1.5) | 1815 (25.8) | 5047 (71.6) | 41.8 | 96.0 |
|  | Rheumatic arthritis | 7044 (100) | 31 (0.4) | 151 (2.1) | 709 (10.1) | 6153 (87.4) | 17.0 | 95.8 |
|  | Migraine/ frequent headaches | 7044 (100) | 38 (0.5) | 144 (2.0) | 603 (8.6) | 6259 (88.9) | 20.9 | 94.1 |
|  | Spinal disc herniation/ back problem | 7044 (100) | 83 (1.2) | 99 (1.4) | 1386 (19.7) | 5476 (77.7) | 45.6 | 94.3 |
|  | Other disease | 7044 (100) | 72 (1.0) | 110 (1.6) | 1332 (18.9) | 5530 (78.5) | 39.6 | 94.9 |
| **Analgesics** | 1+ disease | 7064 (100) | 1030 (14.6) | 50 (0.7) | 4137 (58.6) | 1847 (26.1) | 95.4 | 80.1 |
|  | 1+ psychiatric disease | 7064 (100) | 181 (2.6) | 899 (12.7) | 369 (5.2) | 5615 (79.5) | 16.8 | 67.1 |
|  | 1+ somatic disease | 7064 (100) | 1026 (14.5) | 54 (0.8) | 4074 (57.7) | 1910 (27.0) | 95.0 | 79.9 |
|  | Depression | 7064 (100) | 153 (2.2) | 927 (13.1) | 282 (4.0) | 5702 (80.7) | 14.2 | 64.8 |
|  | Anxiety | 7064 (100) | 103 (1.5) | 977 (13.8) | 206 (2.9) | 5778 (81.8) | 9.5 | 66.7 |
|  | Deep vein thrombosis | 7064 (100) | 43 (0.6) | 1037 (14.7) | 96 (1.4) | 5888 (83.4) | 4.0 | 69.1 |
|  | Heart attack | 7064 (100) | 72 (1.0) | 1008 (14.3) | 245 (3.5) | 5739 (81.2) | 6.7 | 77.3 |
|  | Atherosclerosis | 7064 (100) | 99 (1.4) | 981 (13.9) | 248 (3.5) | 5736 (81.2) | 9.2 | 71.5 |
|  | Angina pectoris | 7064 (100) | 79 (1.1) | 1001 (14.2) | 126 (1.8) | 5858 (82.9) | 7.3 | 61.5 |
|  | Hypertension | 7064 (100) | 458 (6.5) | 622 (8.8) | 1460 (20.7) | 4524 (64.0) | 42.4 | 76.1 |
|  | Diabetes | 7064 (100) | 148 (2.1) | 932 (13.2) | 365 (5.2) | 5619 (79.5) | 13.7 | 71.2 |
|  | Asthma | 7064 (100) | 83 (1.2) | 997 (14.1) | 283 (4.0) | 5701 (80.7) | 7.7 | 77.3 |
|  | Bronchitis | 7064 (100) | 113 (1.6) | 967 (13.7) | 234 (3.3) | 5750 (81.4) | 10.5 | 67.4 |
|  | Allergy (excl. asthma) | 7064 (100) | 175 (2.5) | 905 (12.8) | 931 (13.2) | 5053 (71.5) | 16.2 | 84.2 |
|  | Kidney disease | 7064 (100) | 35 (0.5) | 1045 (14.8) | 84 (1.2) | 5900 (83.5) | 3.2 | 70.6 |
|  | Cancer | 7064 (100) | 79 (1.1) | 1001 (14.2) | 233 (3.3) | 5751 (81.4) | 7.3 | 74.7 |
|  | Osteoarthritis | 7064 (100) | 647 (9.2) | 433 (6.1) | 1254 (17.8) | 4730 (67.0) | 59.9 | 66.0 |
|  | Rheumatic arthritis | 7064 (100) | 280 (4.0) | 800 (11.3) | 463 (6.6) | 5521 (78.2) | 25.9 | 62.3 |
|  | Migraine/ frequent headaches | 7064 (100) | 264 (3.7) | 816 (11.6) | 381 (5.4) | 5603 (79.3) | 24.4 | 59.1 |
|  | Spinal disc herniation/ back problem | 7064 (100) | 519 (7.3) | 561 (7.9) | 963 (13.6) | 5021 (71.1) | 48.1 | 65.0 |
|  | Other disease | 7064 (100) | 370 (5.2) | 710 (10.1) | 1044 (14.8) | 4940 (69.9) | 34.3 | 73.8 |
| **Sleeping medication** | 1+ disease | 6923 (100) | 118 (1.7) | 6 (0.0) | 4924 (71.1) | 1875 (27.1) | 95.2 | 97.7 |
|  | 1+ psychiatric disease | 6923 (100) | 45 (0.7) | 79 (1.1) | 490 (7.1) | 6309 (91.1) | 36.3 | 91.6 |
|  | 1+ somatic disease | 6923 (100) | 115 (1.7) | 9 (0.1) | 4861 (70.2) | 1938 (28.0) | 92.7 | 97.7 |
|  | Depression | 6923 (100) | 37 (0.5) | 87 (1.3) | 383 (4.1) | 6416 (92.7) | 29.8 | 91.2 |
|  | Anxiety | 6923 (100) | 30 (0.4) | 94 (1.4) | 272 (3.9) | 6527 (94.3) | 24.2 | 90.1 |
|  | Deep vein thrombosis | 6923 (100) | 5 (0.0) | 119 (1.7) | 129 (1.9) | 6670 (96.3) | 4.0 | 96.3 |
|  | Heart attack | 6923 (100) | 9 (0.1) | 115 (1.7) | 296 (4.3) | 6503 (93.9) | 7.3 | 97.0 |
|  | Atherosclerosis | 6923 (100) | 12 (0.2) | 112 (1.6) | 323 (4.7) | 6476 (93.5) | 9.7 | 96.4 |
|  | Angina pectoris | 6923 (100) | 5 (0.0) | 119 (1.7) | 188 (2.7) | 6611 (95.5) | 4.0 | 97.4 |
|  | Hypertension | 6923 (100) | 56 (0.8) | 68 (1.0) | 1792 (25.9) | 5007 (72.3) | 45.2 | 97.0 |
|  | Diabetes | 6923 (100) | 20 (0.3) | 104 (1.5) | 481 (6.9) | 6318 (91.3) | 16.1 | 96.0 |
|  | Asthma | 6923 (100) | 12 (0.2) | 112 (1.6) | 346 (5.0) | 6453 (93.2) | 9.7 | 96.6 |
|  | Bronchitis | 6923 (100) | 10 (0.1) | 114 (1.6) | 327 (4.7) | 6472 (93.5) | 8.1 | 97.0 |
|  | Allergy (excl. asthma) | 6923 (100) | 19 (0.3) | 105 (1.5) | 1058 (15.3) | 5741 (82.9) | 15.3 | 98.2 |
|  | Kidney disease | 6923 (100) | 6 (0.0) | 118 (1.7) | 113 (1.6) | 6686 (96.6) | 4.8 | 95.0 |
|  | Cancer | 6923 (100) | 15 (0.2) | 109 (1.6) | 288 (4.2) | 6511 (94.0) | 12.1 | 95.0 |
|  | Osteoarthritis | 6923 (100) | 50 (0.7) | 74 (1.1) | 1789 (25.8) | 5010 (72.4) | 40.3 | 97.3 |
|  | Rheumatic arthritis | 6923 (100) | 28 (0.4) | 96 (1.4) | 686 (9.9) | 6113 (88.3) | 22.6 | 96.1 |
|  | Migraine/ frequent headaches | 6923 (100) | 20 (0.3) | 104 (1.5) | 610 (8.8) | 6189 (89.4) | 16.1 | 96.8 |
|  | Spinal disc herniation/ back problem | 6923 (100) | 52 (0.8) | 72 (1.0) | 1376 (19.9) | 5423 (78.3) | 41.9 | 96.4 |
|  | Other disease | 6923 (100) | 52 (0.8) | 72 (1.0) | 1321 (19.1) | 5478 (79.1) | 41.9 | 96.2 |

Notes: Persons with missing on either drug or disease excluded

**Supplementary Table 3. Lolland-Falster Health Study (LOFUS) adult participants. Disease by alcohol consumption**

|  | **Regular alcohol consumption** | **Rare alcohol consumption** | **Missing** | **Total** |
| --- | --- | --- | --- | --- |
| Total | 1180 (100) | 12394 (100) | 2510 (100) | 16084 (100) |
| 1+ disease  Yes  No | 883 (74.8)  297 (25.2) | 9271 (74.8)  3123 (25.2) | 1401 (55.8)  1109 (44.2) | 11555 (71.8)  4529 (28.2) |
| 1+ psychiatric disease  Yes  No | 132 (11.2)  1048 (88.8) | 1152 (9.3)  11242 (90.7) | 317 (12.6)  2193 (87.4) | 1601 (10.0)  14483 ( 90.0) |
| 1+ somatic disease  Yes  No | 868 (73.6)  312 (26.4) | 9130 (73.7)  3264 (26.3) | 1367 (54.5)  328 (13.1) | 11365 (70.7)  3904 (24.3) |
| Depression  Yes  No | 102 (8.6)  1078 (91.4) | 808 (6.5)  115386 (93.5) | 237 (14.0)  1458 (86.0) | 1147 (7.5)  14122 (92.5) |
| Anxiety  Yes  No | 79 (6.7)  1101 (93.3) | 723 (5.8)  11671 (94.2) | 221 (13.0)  1474 (87.0) | 1023 (6.7)  14246 (93.3) |
| Deep vein thrombosis  Yes  No | 19 (1.6)  1161 (98.4) | 200 (1.6)  12194 (98.4) | 42 (2.5)  1653 (97.5) | 261 (1.7)  15008 (98.3) |
| Heart attack  Yes  No | 37 (3.1)  1143 (96.6) | 347 (2.8)  12047 (97.2) | 63 (3.7%)  1632 (96.3) | 447 (2.9)  14822 (97.1) |
| Atherosclerosis  Yes  No | 37 (3.1)  1143 (96.9) | 355 (2.9)  12039 (97.1) | 74 (4.4)  1621 (95.6) | 466 (3.1)  13803 (96.9) |
| Angina pectoris  Yes  No | 24 (2.0)  1156 (98.0) | 277 (2.2)  12117 (97.8) | 76 (4.5)  1619 (95.5) | 377 (2.5)  14892 (97.5) |
| Hypertension  Yes  No | 347 (29.4)  833 (70.6) | 3031 (24.5)  9363 (75.5) | 503 (29.7)  1192 (70.3) | 3881 (25.4)  11388 /74.6) |
| Diabetes  Yes  No | 73 (6.2)  1107 (93.8) | 606 (4.9)  11788 (95.1) | 167 (9.9)  1528 (90.1) | 846 (5.5)  14423 (94.5) |
| Asthma  Yes  No | 75 (6.4)  1105 (93.6) | 687 (5.5)  11707 (94.5) | 136 (8.0)  1559 (92.0) | 898 (5.9)  14371 (94.1) |
| Bronchitis  Yes  No | 76 (6.4)  1104 (93.6) | 501 (4.0)  11893 (96.0) | 126 (7.4)  1569 (92.6) | 703 (4.6)  14566 (95.4) |
| Allergy (excl. asthma)  Yes  No | 216 (18.3)  964 (81.7) | 2235 (18.0)  10159 (82.0) | 292 (17.2)  1403 (82.8) | 2743 (18.0)  12526 (82.0) |
| Kidney disease  Yes  No | 13 (1.1)  1167 (98.9) | 152 (1.2)  12242 (98.8) | 42 (2.5)  1653 (97.5) | 207 (1.4)  15062 (98.6) |
| Cancer  Yes  No | 31 (2.6)  1149 (97.4) | 501 (4.0)  11893 (96.0) | 73 (4.3)  1622 (95.7) | 605 (4.0)  14664 (96.0) |
| Osteoarthritis  Yes  No | 342 (29.0)  838 (71.0) | 3709 (29.9)  8685 (70.1) | 633 (37.3)  1062 (62.7) | 4684 (30.7)  10585 (69.3) |
| Rheumatic arthritis  Yes  No | 145 (12.3)  1035 (87.7) | 1002 (8.1)  11293 (91.9) | 231 (13.6)  1464 (86.4) | 1378 (9.0)  13891 (91.0) |
| Migraine/ frequent headaches  Yes  No | 102 (8.6)  1078 (91.4) | 1772 (14.3)  10622 (85.7) | 338 (19.9)  1357 (80.1) | 2212 (14.5)  13057 (85.5) |
| Spinal disc herniation/ back problem  Yes  No | 234 (19.8)  946 (80.2) | 2320 (18.7)  10074 (81.3) | 420 (24.8)  1275 (75.2) | 2974 (19.5)  12295 (80.5) |
| Other disease  Yes  No | 231 (19.6)  949 (80.4) | 2710 (21.9)  9684 (78.1) | 498 (29.4)  1197 (70.6) | 3439 (22.5)  11830 (77.5) |
